# Supplementary material for: Acetyl Groups in Typha capensis: Fate of Acetates during Organosolv and Ionosolv Pulping
Source: PubMed Central journal article supplement (PMC6404047; doi:10.3390/polym10060619), 2018-06-05
Supplement: polymers-10-00619-s001.pdf [file polymers-10-00619-s001.pdf]

## SUPPLEMENTARY INFORMATION

# Acetyl groups in *Typha capensis*: Fate of acetates during organosolv and ionosolv pulping

Idi Guga Audu <sup>1,2,3,4,\*</sup>, Nicolas Brosse <sup>2</sup>, Heiko Winter <sup>1,3</sup>, Anton Hoffmann <sup>4</sup>, Martina Bremer <sup>4</sup>, Steffen Fischer <sup>4</sup> and Marie-Pierre Laborie <sup>1,3</sup>

<sup>1</sup> Chair of Forest Biomaterials, University of Freiburg, Werthmannstr. 6, 79085 Freiburg i. Br., Germany; [idig.audu@gmail.com](mailto:idig.audu@gmail.com), [heiko.winter@biomat.uni-freiburg.de](mailto:heiko.winter@biomat.uni-freiburg.de), [marie-pierre.laborie@biomat.uni-freiburg.de](mailto:marie-pierre.laborie@biomat.uni-freiburg.de)

<sup>2</sup> LERMAB, Faculté des Sciences et Technologies, University de Lorraine, Boulevard des Aiguillettes BP 70239, 54506 Vandœuvre lès Nancy Cedex, France; [Nicolas.Brosse@univ-lorraine.fr](mailto:Nicolas.Brosse@univ-lorraine.fr)

<sup>3</sup> Freiburg Materials Research Center (FMF), University of Freiburg, Stefan-Meier-Str. 21, 79104 Freiburg i. Br., Germany;

<sup>4</sup> Institute of Plant and Wood Chemistry, Technische Universität Dresden, Piennner Straße 19, 01737 Tharandt, Germany; [anton.hoffmann@forst.tu-dresden.de](mailto:anton.hoffmann@forst.tu-dresden.de), [martina.bremer@forst.tu-dresden.de](mailto:martina.bremer@forst.tu-dresden.de), [sfischer@forst.tu-dresden.de](mailto:sfischer@forst.tu-dresden.de)

\* Correspondence: [idig.audu@gmail.com](mailto:idig.audu@gmail.com); Tel.: +49-152-148-040-56

Table S1. Raman Band assignment for in-situ TC

| Band cm <sup>-1</sup> | Intensity | Assignment                                                                                                                                          |
|-----------------------|-----------|-----------------------------------------------------------------------------------------------------------------------------------------------------|
| 3068                  | 0.54      | C-H aromatic stretch                                                                                                                                |
| 2938                  | 8.32      | C-H stretch in OCH <sub>3</sub> , asymmetric, acetylated                                                                                            |
| 1710                  | 1.27      | Carbonyl stretch, if broad could be protein or acyl group in lignin                                                                                 |
| 1632                  | 17.18     | Double bond C=C Stretching vibration; Lignin C=C stretch of coniferaldehyde, sinapaldehyde, phenolic esters                                         |
| 1605                  | 30.56     | Aromatic C=C stretching vibrations                                                                                                                  |
| 1464                  | 4.52      | lignin OCH <sub>3</sub> deformation, cellulose HCC and HOC bend                                                                                     |
| 1380                  | 2.35      | Lignin symmetric CH deformation; cellulose HCC, HCO and HOC Bend                                                                                    |
| 1332                  | 1.45      | Aliphatic O-H bend                                                                                                                                  |
| 1267                  | 2.17      | Aryl-O of aryl-OH and aryl-O-CH <sub>3</sub> ; guaiacyl ring (with C=O group) mode                                                                  |
| 1204                  | 1.27      | lignin O-CH <sub>3</sub> vibrations                                                                                                                 |
| 1172                  | 4.52      | Lignin hydroxyl COH bend, aromatic skeletal vibrations                                                                                              |
| 1122                  | 3.26      | Cellulose CC and CO stretch, lignin methoxy vibrations, aryl CH Bend                                                                                |
| 1095                  | 3.62      | Cellulose CC and CO stretch                                                                                                                         |
| 1038                  | 0.18      | Cellulose CC and CO stretching; Lignin CH <sub>3</sub> wagging, CH <sub>3</sub> out-of-plane rock, aromatic skeletal vibrations, methoxy vibrations |
| 982                   | 1.09      | Lignin CCH wag, aromatic skeletal vibrations                                                                                                        |
| 897                   | 2.17      | Cellulose HCC and HCO bending; Trans C-H wag                                                                                                        |
| 860                   | 0.72      | In phase C-C-O stretch                                                                                                                              |
| 805                   | 0.90      | CO stretch; aryl symmetric CH bend, CH out of plane bend                                                                                            |

Table S2. 2D HSQC  $^{13}\text{C}$ - $^1\text{H}$  correlations signals and assignment for TC<sub>extr</sub> and TC lignin Isolates. Acetylated units in green highlights.

| <u>TC<sub>extr</sub></u> | <u>MWL</u>                                              | <u>ILL</u>       | <u>EOL</u> | <u>Assignment</u>                                                                        |
|--------------------------|---------------------------------------------------------|------------------|------------|------------------------------------------------------------------------------------------|
|                          | <u><math>\delta\text{C}/\delta\text{H}</math> (ppm)</u> |                  |            |                                                                                          |
| 20.6/1.98                | 20.5/2.05                                               |                  |            | methyl in acetate peak linked to xylan moieties                                          |
|                          | 53.6/3.0                                                | 53.0/3.09        |            | B <sub>β</sub> Cβ-Hβ in β-β', α-O-γ or γ-O-α linkages (resinol) substructures            |
|                          | 53.5/3.69                                               |                  | 53.5/3.65  | C <sub>β</sub> Cβ-Hβ in β-5' & α-O-4' phenylcoumaran substructures                       |
| 55.1/3.68                | 55.1/3.67                                               | 54.9/3.7         | 55.3/3.69  | MeO C-H in methoxyls                                                                     |
|                          | 59.6/3.52                                               | 59.4/3.41 - 3.16 | 60.4/3.3   | A <sub>γ</sub> CγHγ in β-O-4' substructures and others                                   |
| 60.3/3.45                | 59.6/3.16                                               | 59.1/3.18 & 2.79 |            | D <sub>β</sub> Cβ-Hβ in β-1 (Spirodienone) substructures formed by β-1', α-O-α' linkages |
|                          |                                                         | 61.9/4.04        |            | J <sub>γ</sub> Cγ-Hγ in Cinnamyl alcohol end groups                                      |
| 62.5/3.8                 | 62.5/4.21; 62.4/3.64                                    | 61.9/4.29-3.78   | 63.2/4.44  | A <sub>γ</sub> CγHγ in γ-acetylated β-O-4' substructures                                 |
|                          |                                                         | 63.1/3.69        |            | B <sub>γ</sub> Cγ-Hγ in β-5 (phenolcoumaran) substructures (resinols)                    |
|                          | 64.1/4.71                                               |                  |            | J <sub>γ</sub> Cγ-Hγ in Cinnamyl acetate end groups                                      |
|                          |                                                         |                  | 66.5/4.08  | HK Hibbert keton                                                                         |
|                          |                                                         | 70.4/4.13        | 71.0/4.18  | B <sub>β</sub> Resinol substructure β-β' in Cγ/Hγ correlations                           |
|                          | 71.4/4.1, 3.76                                          | 71.6/3.78        | 71.1/4.31  | B <sub>γ</sub> Cγ-Hγ in β-β', α-O-γ or γ-O-α linkages (resinol) substructures            |
| 71.3/4.78                | 71.2/4.78                                               | 71.6/4.87        | 71.6/4.83  | A <sub>α</sub> Cα-Hα in β-O-4' substructures                                             |
|                          |                                                         |                  | 72.5/3.14  | A <sub>α</sub> Cα-Hα in β-O-4' substructures                                             |
| 73.2/2.87                | 73.3/3.16                                               | 72.7/3.01        |            | X2 C2-H2 in 2-O-acetyl-β-D-xylopyranoside                                                |
|                          |                                                         | 73.7/3.26        |            | X3 C3-H3 in β-D-xylopyranoside                                                           |
| 74.5/4.73                | 74.5/4.73                                               | 74.3/3.86        |            | X3 C3-H3 in 3-O-acetyl-β-D-xylopyranoside                                                |
|                          | 75.2/3.49                                               | 75.4/3.52        |            | X4 C4-H4 in β-D-xylopyranoside                                                           |
| 79.5/3.35                |                                                         |                  |            | A <sub>α</sub> Cα-Hα in β-O-4' substructure (α, β-diaryl ethers)                         |
| 81.6/3.79                |                                                         | 81.6/4.9         | 80.8/4.56  | D <sub>α</sub> Cα-Hα in β-1 (Spirodienone) substructures formed by β-1', α-O-α' linkages |
| 83.2/4.23                | 83.1/4.24                                               | 83.3/4.29        |            | A <sub>β(G)</sub> Cβ-Hβ in β-O-4' substructures linked to a G unit                       |
| 83.3/3.73                |                                                         |                  |            | A <sub>α</sub> Cα-Hα in 5-5' (dibenzodioxocin) substructures (β-O-4' linkages)           |
|                          | 84.7/4.58                                               |                  | 84.9/4.58  | A <sub>β(G)</sub> Cβ-Hβ in β-O-4' substructures linked to a G unit                       |
| 85.7/3.4                 | 85.4/4.05                                               | 84.7/4.65        |            | B <sub>α</sub> Cα-Hα in β-β', α-O-γ or γ-O-α linkages (resinol) substructures            |
|                          |                                                         | 86.1/4.05        |            | A <sub>β(S)</sub> Cβ-Hβ in β-O-4' substructures linked to a S unit                       |
|                          | 86.6/5.39                                               | 86.4/5.47        | 86.7/5.42  | C <sub>α</sub> Cα-Hα in β-5' phenylcoumaran substructures formed by β-5' and α-O-4       |
| 98.4/4.84                | 98.6/4.66                                               | 97.6/4.91        |            | β-D <sub>m</sub> β-D-Mannosyl (mannose residues)                                         |

| <u>TC<sub>extr</sub></u> | <u>MWL</u>       | <u>ILL</u>         | <u>EOL</u>       | <u>Assignment</u> |                                                         |
|--------------------------|------------------|--------------------|------------------|-------------------|---------------------------------------------------------|
| <u>δC/δH (ppm)</u>       |                  |                    |                  |                   |                                                         |
| 99.0/4.60                | 99.4/4.45        | 100.6/4.45         |                  | α-D <sub>ga</sub> | α-D-Galactosyl (galactose residues)                     |
| 102.0/4.23               | 102.0/4.25       | 101.9/4.22         |                  | β-D <sub>gl</sub> | β-D-Glucosyl (Glucose residues)                         |
| 103.1/6.63               | 103.1/6.65       | 103.8/6.77         | 103.5/6.67       | S                 | C2-H2 and C6-H6 in syringyl units                       |
| 107.3/5.12               | 105.6/7.19       | 106.6/7.26         | 105.9/7.3        | S'                | C2-H2 and C6-H6 in oxidized (Cα=O) syringyl units       |
| 110.4/6.85               | 109.5/6.98       | 110.6/6.99         | 109.5/7.07       | G                 | C2-H2 in guaiacyl units (G)                             |
| 109.7/7.29               | 110.5/7.38       | 109.6/7.25         | 110.6/7.32       | G'                | C2-H2 in oxydized α-ketone structure of G'              |
|                          | 112.5/6.11       | 112.4/6.11         | 111.4/6.63       | G                 | C2-H2 in guaiacyl units (G)                             |
| 115.3/6.7                |                  | 115.1/6.76 & 6.92  | 115.2/6.63       | G/H               | C3-H3 and C5-H5 in p-coumarate (PCA); overlaps of H & G |
| 118.8/6.72               | 119.4/6.77       | 118.9/6.84         | 118.7/6.87 & 6.7 | G                 | C6-H6 in guaiacyl units (G)                             |
|                          |                  | 119.9/7.66         | 119.20/7.16      | G                 | C6-H6 in guaiacyl units (G)                             |
|                          | 122.1/7.12-7.49  |                    |                  | U                 | unknown                                                 |
|                          | 127.4/7.21       | 127.8/7.22 & 6.23, | 126.9/7.25       | H                 | C2,6-H2,6 in p-hydroxyphenyl units (H)                  |
|                          |                  | 128.2/6.44         |                  | J                 | Cα-Hα in cinnamyl alcohol end-groups                    |
| 129.0/5.27               |                  | 129.4/5.3          | 129.6/5.24       | F                 | Cα and Cβ of p-hydroxycinnamyl alcohol (F)              |
|                          | 128.3/7.42, 5.28 | 128.7/7.26         | 128.2/7.66       | P                 | p-coumarate 2,6 corelations                             |
| 129.7/7.45               | 130.5/7.5        | 129.5/7.43         | 129.9/7.46       | P                 | C2-H2 and C6-H6 in p-coumarate (PCA)                    |
|                          | 144.6/7.64-7.14  |                    | 144.4/7.49       | P                 | Cα-Hα in p-coumarate (PCA) and ferulate (FA)            |

Tables S3a – e. HSQC volume integrations for estimation of acetyl groups associated units.

| Table S3a. Integral values for TC <sub>extr</sub> |                |                |             |             |               |            |
|---------------------------------------------------|----------------|----------------|-------------|-------------|---------------|------------|
| Object                                            | Integral [abs] | Integral [rel] | v(F2) [ppm] | v(F1) [ppm] | Normalization | % Integral |
| Integral 1                                        | 2910600000     | 1              | 2.30        | 38.35       | 277.78        | 66.99      |
| Integral 2                                        | 69189000       | 0.0238         | 1.86        | 20.50       | 6.61          | 1.59       |
| Integral 3                                        | 7521000        | 0.0026         | 0.80        | 12.98       | 0.72          | 0.17       |
| Integral 4                                        | 27160000       | 0.0093         | 0.94        | 17.60       | 2.58          | 0.62       |
| Integral 5                                        | 16555000       | 0.0057         | 0.83        | 21.58       | 1.58          | 0.38       |
| Integral 6                                        | 61055000       | 0.021          | 1.32        | 23.73       | 5.83          | 1.41       |
| Integral 7                                        | 207350000      | 0.0712         | 1.20        | 29.21       | 19.78         | 4.77       |
| Integral 8                                        | 14292000       | 0.0049         | 1.89        | 25.99       | 1.36          | 0.33       |
| Integral 9                                        | 4172000        | 0.0014         | 2.19        | 32.76       | 0.39          | 0.09       |
| Integral 10                                       | 8769300        | 0.003          | 1.96        | 33.73       | 0.83          | 0.20       |
| Integral 11                                       | 197820000      | 0.068          | 3.63        | 55.12       | 18.89         | 4.56       |
| Integral 12                                       | 49656000       | 0.0171         | 4.12        | 62.00       | 4.75          | 1.15       |
| Integral 13                                       | 254890000      | 0.0876         | 3.35        | 62.00       | 24.33         | 5.87       |
| Integral 14                                       | 43323000       | 0.0149         | 3.75        | 81.35       | 4.14          | 1.00       |
| Integral 15                                       | 143880000      | 0.0494         | 2.97        | 69.95       | 13.72         | 3.31       |
| Integral 16                                       | 60852000       | 0.0209         | 3.32        | 77.26       | 5.81          | 1.40       |
| Integral 17                                       | 4894000        | 0.0017         | 3.39        | 85.22       | 0.47          | 0.11       |
| Integral 18                                       | 39267000       | 0.0135         | 4.72        | 72.00       | 3.75          | 0.90       |
| Integral 19                                       | 8018700        | 0.0028         | 5.25        | 128.65      | 0.78          | 0.19       |
| Integral 20                                       | 5790700        | 0.002          | 4.98        | 98.55       | 0.56          | 0.13       |
| Integral 21                                       | 27192000       | 0.0093         | 4.55        | 98.66       | 2.58          | 0.62       |
| Integral 22                                       | 69627000       | 0.0239         | 4.29        | 102.20      | 6.64          | 1.60       |
| Integral 23                                       | 17105000       | 0.0059         | 6.59        | 103.60      | 1.64          | 0.40       |
| Integral 24                                       | 10559000       | 0.0036         | 6.89        | 110.05      | 1.00          | 0.24       |
| Integral 25                                       | 48226000       | 0.0166         | 6.60        | 113.92      | 4.61          | 1.11       |
| Integral 26                                       | 8572100        | 0.0029         | 6.73        | 117.90      | 0.81          | 0.19       |
| Integral 27                                       | 28264000       | 0.0097         | 7.12        | 127.57      | 2.69          | 0.65       |
|                                                   |                | 1.4927         | 97.542      | 1822.4254   | 414.6388889   | 100        |
|                                                   |                |                |             |             | Ac in Lignin  | 7.92       |
|                                                   |                |                |             |             | Ac in HS      | 4.90       |
|                                                   |                |                |             |             | Ac Total      | 12.82      |

| Table S3b. HSQC Integral values for MWL |                |                |             |             |               |            |
|-----------------------------------------|----------------|----------------|-------------|-------------|---------------|------------|
| Object                                  | Integral [abs] | Integral [rel] | v(F2) [ppm] | v(F1) [ppm] | Normalization | % Integral |
| Integral 1                              | 5402000000     | 1              | 3.61        | 53.46       | 4.56          | 32.71      |
| Integral 2                              | 999880000      | 0.1851         | 4.68        | 70.98       | 0.84          | 6.05       |
| Integral 3                              | 566290000      | 0.1048         | 1.84        | 19.27       | 0.48          | 3.43       |
| Integral 4                              | 676500000      | 0.1252         | 4.25        | 62.17       | 0.57          | 4.09       |
| Integral 5                              | 2174000000     | 0.4024         | 3.38        | 61.20       | 1.84          | 13.16      |
| Integral 6                              | 288290000      | 0.0534         | 2.99        | 70.23       | 0.24          | 1.75       |
| Integral 7                              | 331570000      | 0.0614         | 3.57        | 75.07       | 0.28          | 2.01       |
| Integral 8                              | 147310000      | 0.0273         | 4.08        | 69.69       | 0.12          | 0.89       |
| Integral 9                              | 236980000      | 0.0439         | 3.59        | 68.08       | 0.20          | 1.44       |
| Integral 10                             | 166390000      | 0.0308         | 4.94        | 81.19       | 0.14          | 1.01       |
| Integral 11                             | 301360000      | 0.0558         | 4.49        | 80.98       | 0.25          | 1.82       |
| Integral 12                             | 482880000      | 0.0894         | 4.03        | 84.10       | 0.41          | 2.92       |
| Integral 13                             | 159370000      | 0.0295         | 5.45        | 86.25       | 0.13          | 0.96       |
| Integral 14                             | 116420000      | 0.0216         | 4.24        | 100.87      | 0.10          | 0.71       |
| Integral 15                             | 942360000      | 0.1744         | 6.67        | 103.55      | 0.80          | 5.70       |
| Integral 16                             | 63524000       | 0.0118         | 7.22        | 104.52      | 0.05          | 0.39       |
| Integral 17                             | 1183700000     | 0.2191         | 7.04        | 110.97      | 1.00          | 7.17       |
| Integral 18                             | 596270000      | 0.1104         | 6.58        | 113.34      | 0.50          | 3.61       |
| Integral 19                             | 670470000      | 0.1241         | 6.75        | 118.50      | 0.57          | 4.06       |
| Integral 20                             | 160610000      | 0.0297         | 7.12        | 127.10      | 0.14          | 0.97       |
| Integral 21                             | 186560000      | 0.0345         | 7.46        | 128.82      | 0.16          | 1.13       |
| Integral 22                             | 64399000       | 0.0119         | 7.48        | 143.97      | 0.05          | 0.39       |
| Integral 23                             | 28805000       | 0.0053         | 6.19        | 127.85      | 0.02          | 0.17       |
| Integral 24                             | 23104000       | 0.0043         | 6.41        | 126.99      | 0.02          | 0.14       |
| Integral 25                             | 15588000       | 0.0029         | 8.54        | 148.81      | 0.01          | 0.09       |
| Integral 26                             | 41983000       | 0.0078         | 2.97        | 51.95       | 0.04          | 0.26       |
| Integral 27                             | 332640000      | 0.0616         | 1.15        | 27.77       | 0.28          | 2.01       |
| Integral 28                             | 60349000       | 0.0112         | 1.39        | 23.36       | 0.05          | 0.37       |
| Integral 29                             | 35910000       | 0.0066         | 7.14        | 121.94      | 0.03          | 0.22       |
| Integral 30                             | 23733000       | 0.0044         | 7.35        | 123.01      | 0.02          | 0.14       |
| Integral 31                             | 37650000       | 0.007          | 4.62        | 63.24       | 0.03          | 0.23       |
|                                         |                |                |             |             | 13.96         | 100.00     |
|                                         |                |                |             |             | Ac in Lignin  | 20.41      |
|                                         |                |                |             |             | Ac in HS      | 7.18       |
|                                         |                |                |             |             | Ac Total      | 27.59      |

| Table S3c. HSQC Integral values for ILL |                |                |             |             |               |            |
|-----------------------------------------|----------------|----------------|-------------|-------------|---------------|------------|
| Object                                  | Integral [abs] | Integral [rel] | v(F2) [ppm] | v(F1) [ppm] | Normalization | % Integral |
| Integral 1                              | 3763800000     | 1              | 3.64        | 55.48       | 14.20         | 37.46      |
| Integral 2                              | 87731000       | 0.0233         | 1.18        | 14.85       | 0.33          | 0.87       |
| Integral 3                              | 66739000       | 0.0177         | 0.78        | 13.56       | 0.25          | 0.66       |
| Integral 4                              | 122960000      | 0.0327         | 0.77        | 19.15       | 0.46          | 1.22       |
| Integral 5                              | 136330000      | 0.0362         | 0.77        | 21.84       | 0.51          | 1.36       |
| Integral 6                              | 942360000      | 0.2504         | 1.16        | 28.72       | 3.56          | 9.38       |
| Integral 7                              | 21189000       | 0.0056         | 1.21        | 21.19       | 0.08          | 0.21       |
| Integral 8                              | 477890000      | 0.127          | 1.56        | 23.77       | 1.80          | 4.76       |
| Integral 9                              | 52131000       | 0.0139         | 1.94        | 26.24       | 0.20          | 0.52       |
| Integral 10                             | 2833900        | 0.0008         | 3.73        | 33.98       | 0.01          | 0.03       |
| Integral 11                             | 448810000      | 0.1192         | 4.80        | 71.18       | 1.69          | 4.46       |
| Integral 12                             | 409840000      | 0.1089         | 3.42        | 59.03       | 1.55          | 4.08       |
| Integral 13                             | 331290000      | 0.088          | 3.76        | 63.12       | 1.25          | 3.30       |
| Integral 14                             | 133770000      | 0.0355         | 3.15        | 63.22       | 0.50          | 1.33       |
| Integral 15                             | 227050000      | 0.0603         | 2.99        | 72.15       | 0.86          | 2.26       |
| Integral 16                             | 228270000      | 0.0606         | 3.28        | 72.68       | 0.86          | 2.27       |
| Integral 17                             | 216320000      | 0.0575         | 3.46        | 75.05       | 0.82          | 2.15       |
| Integral 18                             | 73794000       | 0.0196         | 3.79        | 70.86       | 0.28          | 0.73       |
| Integral 19                             | 240760000      | 0.064          | 3.98        | 86.12       | 0.91          | 2.40       |
| Integral 20                             | 95429000       | 0.0254         | 4.25        | 82.57       | 0.36          | 0.95       |
| Integral 21                             | 198790000      | 0.0528         | 4.23        | 101.82      | 0.75          | 1.98       |
| Integral 22                             | 37551000       | 0.01           | 5.42        | 87.09       | 0.14          | 0.37       |
| Integral 23                             | 671390000      | 0.1784         | 6.68        | 103.43      | 2.53          | 6.68       |
| Integral 24                             | 265010000      | 0.0704         | 6.99        | 110.52      | 1.00          | 2.64       |
| Integral 25                             | 293410000      | 0.078          | 6.76        | 113.86      | 1.11          | 2.92       |
| Integral 26                             | 131920000      | 0.035          | 6.80        | 118.48      | 0.50          | 1.31       |
| Integral 27                             | 40124000       | 0.0107         | 6.11        | 113.86      | 0.15          | 0.40       |
| Integral 28                             | 156650000      | 0.0416         | 7.17        | 128.37      | 0.59          | 1.56       |
| Integral 29                             | 50926000       | 0.0135         | 7.39        | 130.41      | 0.19          | 0.51       |
| Integral 30                             | 36345000       | 0.0097         | 5.27        | 129.87      | 0.14          | 0.36       |
| Integral 31                             | 31435000       | 0.0084         | 1.97        | 36.13       | 0.12          | 0.31       |
| Integral 32                             | 55035000       | 0.0146         | 4.07        | 61.72       | 0.21          | 0.55       |
|                                         |                |                |             |             | 37.92         | 100.00     |
|                                         |                |                |             |             | Ac in Lignin  | 5.58       |
|                                         |                |                |             |             | Ac in HS      | 4.41       |
|                                         |                |                |             |             | Ac Total      | 9.99       |

| Table S3d. HSQC Integral values for EOL |                |                |             |             |               |            |  |
|-----------------------------------------|----------------|----------------|-------------|-------------|---------------|------------|--|
| Object                                  | Integral [abs] | Integral [rel] | v(F2) [ppm] | v(F1) [ppm] | Normalization | % Integral |  |
| Integral 1                              | 3381000000     | 1              | 3.58        | 55.20       | 2.94          | 24.46      |  |
| Integral 2                              | 566860000      | 0.1677         | 0.98        | 13.39       | 0.49          | 4.10       |  |
| Integral 3                              | 86442000       | 0.0256         | 0.79        | 21.56       | 0.08          | 0.63       |  |
| Integral 4                              | 71489000       | 0.0211         | 0.75        | 18.44       | 0.06          | 0.52       |  |
| Integral 5                              | 299070000      | 0.0885         | 1.40        | 24.03       | 0.26          | 2.16       |  |
| Integral 6                              | 198410000      | 0.0587         | 1.18        | 22.42       | 0.17          | 1.44       |  |
| Integral 7                              | 2070900000     | 0.6125         | 1.11        | 28.54       | 1.80          | 14.98      |  |
| Integral 8                              | 199170000      | 0.0589         | 1.33        | 31.88       | 0.17          | 1.44       |  |
| Integral 9                              | 74404000       | 0.022          | 1.91        | 25.86       | 0.06          | 0.54       |  |
| Integral 10                             | 71035000       | 0.021          | 2.01        | 29.19       | 0.06          | 0.51       |  |
| Integral 11                             | 310880000      | 0.0919         | 2.16        | 33.17       | 0.27          | 2.25       |  |
| Integral 12                             | 2201300000     | 0.6511         | 3.59        | 59.93       | 1.92          | 15.92      |  |
| Integral 13                             | 255830000      | 0.0757         | 3.37        | 64.23       | 0.22          | 1.85       |  |
| Integral 14                             | 164080000      | 0.0485         | 4.00        | 65.63       | 0.14          | 1.19       |  |
| Integral 15                             | 77999000       | 0.0231         | 5.26        | 129.05      | 0.07          | 0.56       |  |
| Integral 16                             | 37547000       | 0.0111         | 3.14        | 72.30       | 0.03          | 0.27       |  |
| Integral 17                             | 19500000       | 0.0058         | 4.44        | 62.73       | 0.02          | 0.14       |  |
| Integral 18                             | 428990000      | 0.1269         | 6.58        | 102.93      | 0.37          | 3.10       |  |
| Integral 19                             | 950070000      | 0.281          | 6.51        | 108.84      | 0.83          | 6.87       |  |
| Integral 20                             | 1148900000     | 0.3398         | 6.58        | 114.33      | 1.00          | 8.31       |  |
| Integral 21                             | 106860000      | 0.0316         | 7.18        | 106.69      | 0.09          | 0.77       |  |
| Integral 22                             | 143670000      | 0.0425         | 7.23        | 110.24      | 0.13          | 1.04       |  |
| Integral 23                             | 290070000      | 0.0858         | 6.69        | 119.16      | 0.25          | 2.10       |  |
| Integral 24                             | 529240000      | 0.1565         | 7.06        | 127.76      | 0.46          | 3.83       |  |
| Integral 25                             | 101390000      | 0.03           | 7.42        | 129.70      | 0.09          | 0.73       |  |
| Integral 26                             | 39421000       | 0.0117         | 7.42        | 123.57      | 0.03          | 0.29       |  |
|                                         |                |                |             |             | 12.03         | 100.00     |  |
|                                         |                |                |             |             | Ac in Lignin  | 1.33       |  |
|                                         |                |                |             |             | Ac in HS      | 0.27       |  |
|                                         |                |                |             |             | Ac Total      | 1.60       |  |

Table S3e. Summary of acetate values as % of total integrals of the HSQC chemical shifts

| Sample             | Acetate on<br>Lignin Moieties | Acetate on<br>Xylan Moieties | Total Acetate |
|--------------------|-------------------------------|------------------------------|---------------|
|                    | (%)                           | (%)                          |               |
| TC <sub>extr</sub> | 7.92                          | 4.9                          | 12.82         |
| MWL                | 20.41                         | 7.18                         | 27.59         |
| ILL                | 5.58                          | 4.41                         | 9.99          |
| EOL                | 1.33                          | 0.27                         | 1.6           |



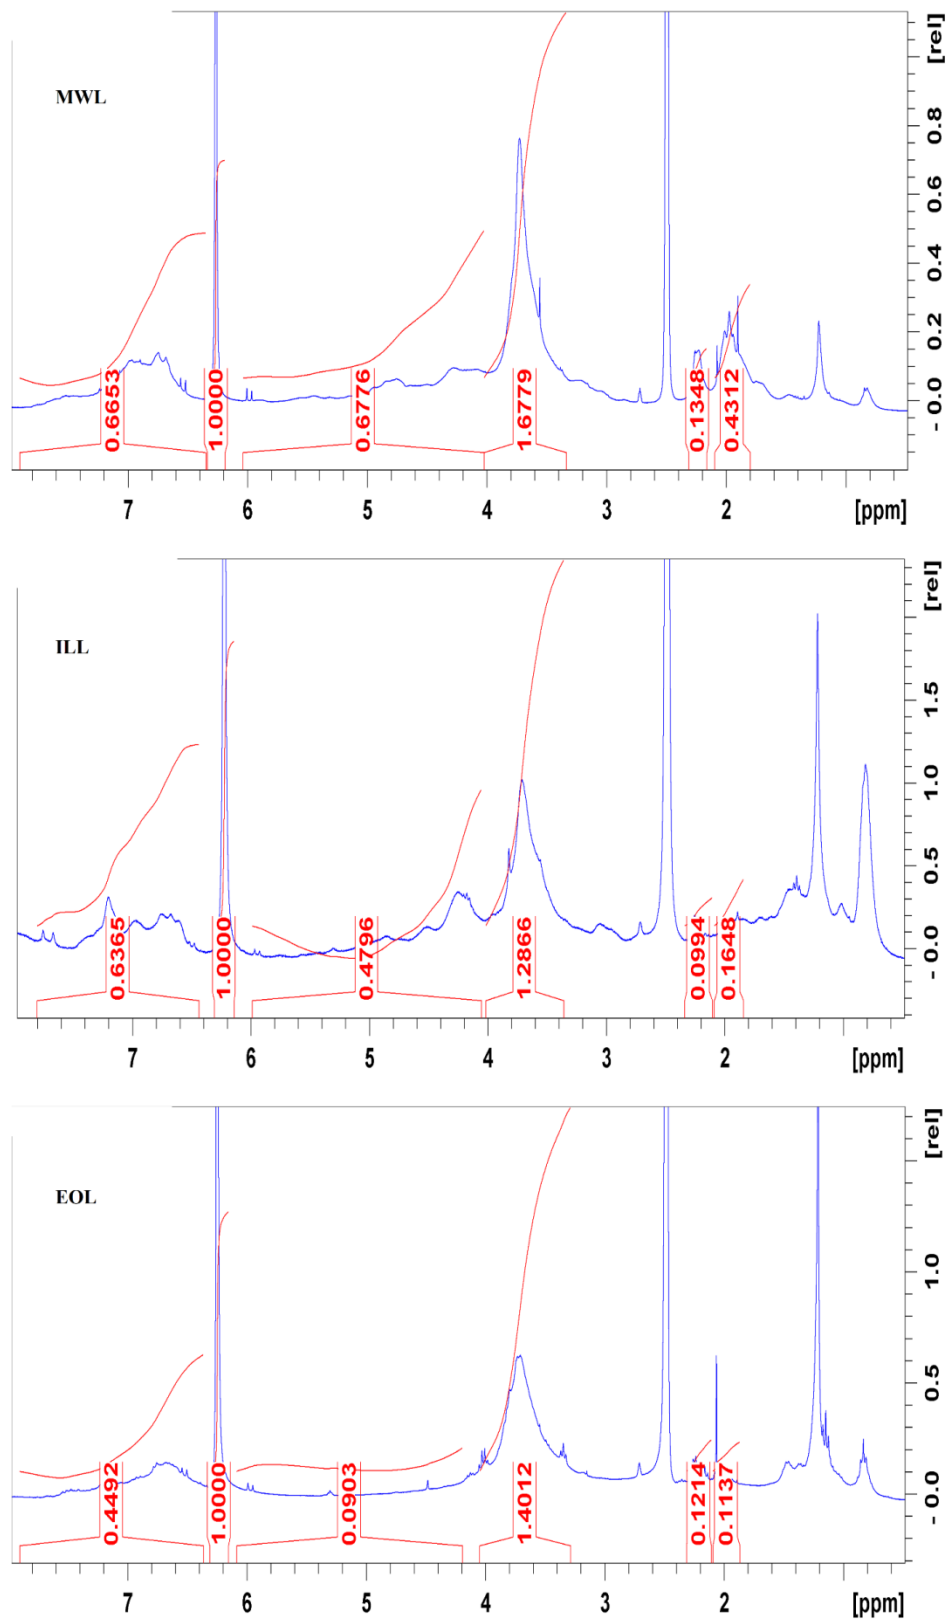

Figure S1. <sup>1</sup>H NMR Integrals from which values of aromatic and aliphatic acetate were estimated.

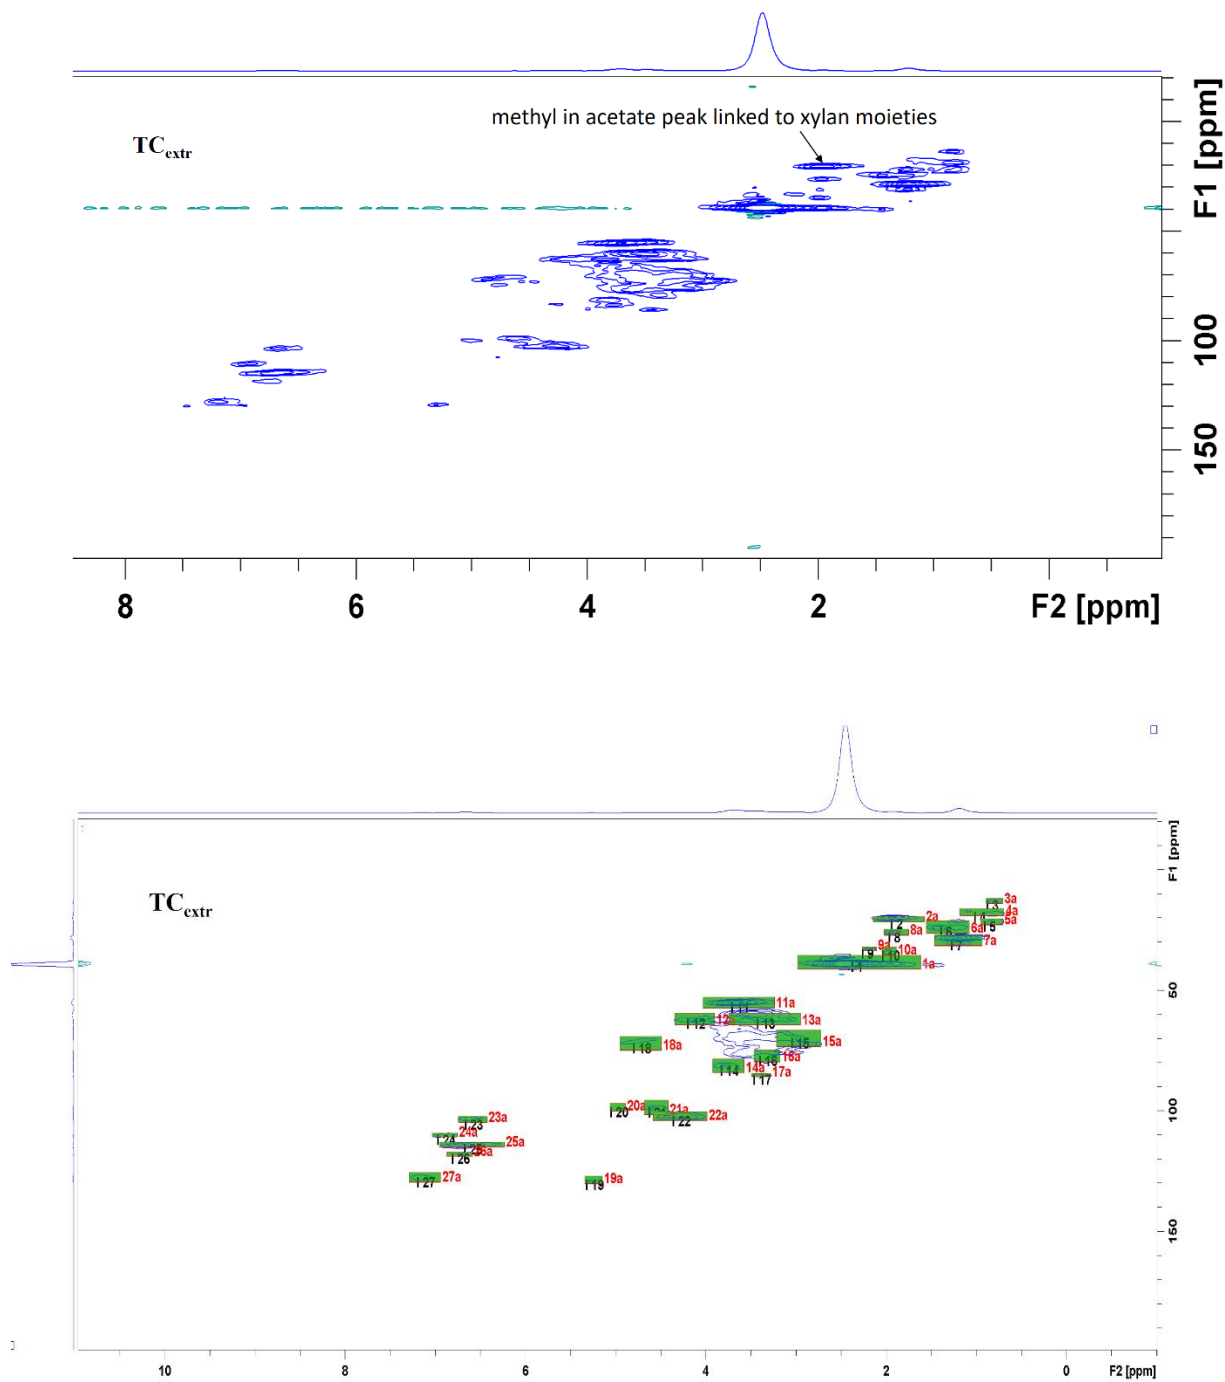

Figure S2a. Full spectra and volume integrations for  $TC_{extr}$  and lignin samples. NB. Methyl acetate linked to xylan are seen in the full spectrum.

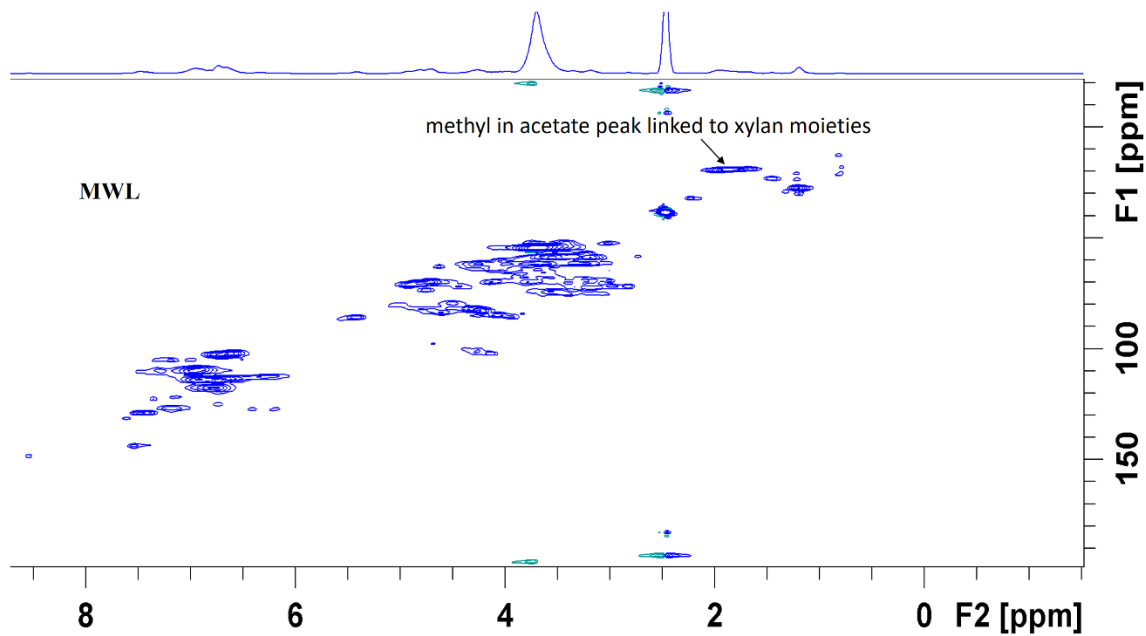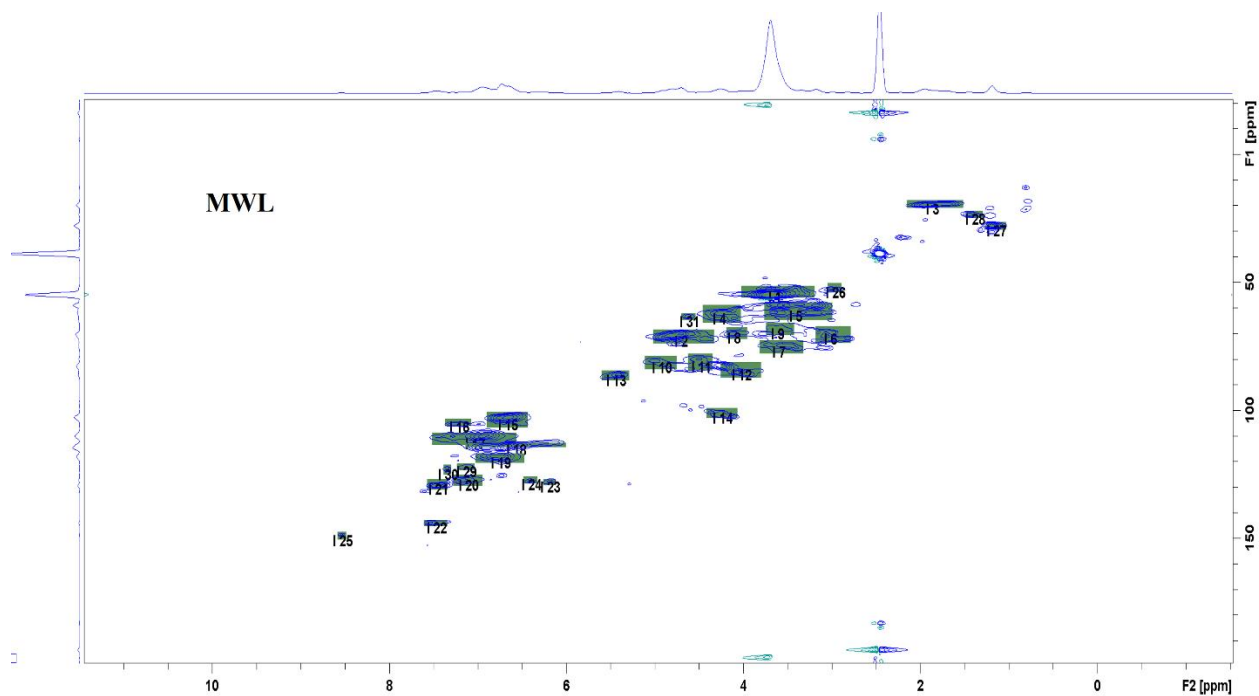

Figure S2b. Full spectra and volume integrations for TC MWL. NB. Methyl acetate linked to xylan are seen in the full spectrum.

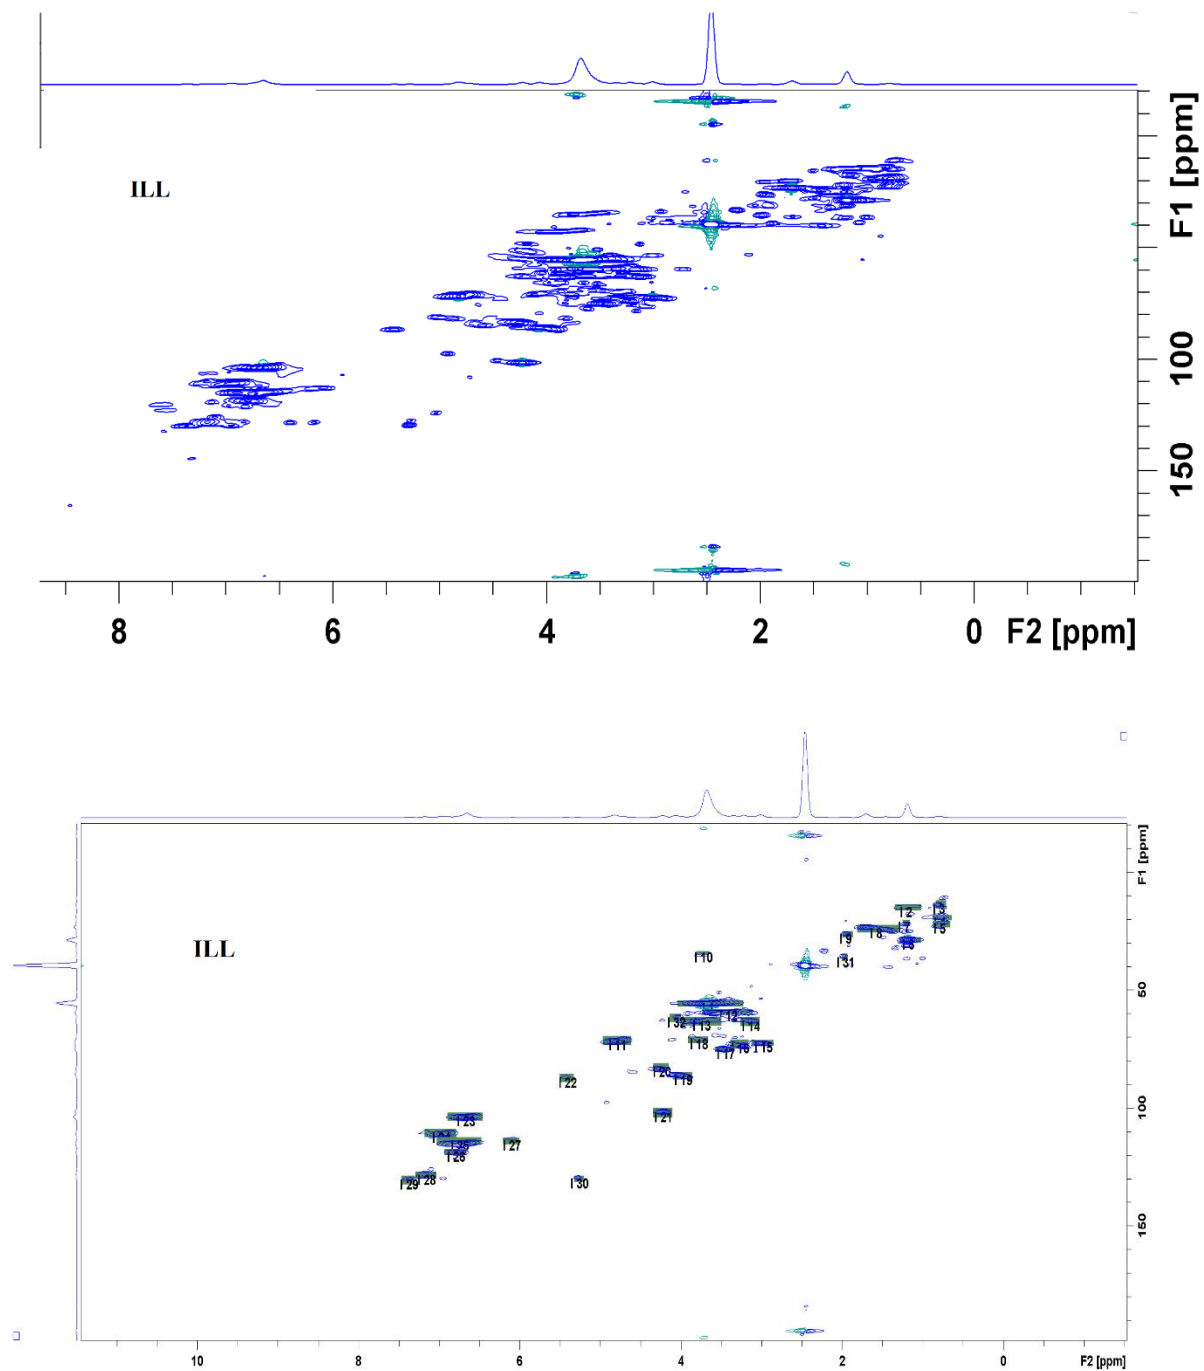

Figure S2c. Full spectra and volume integrations for TC ILL.

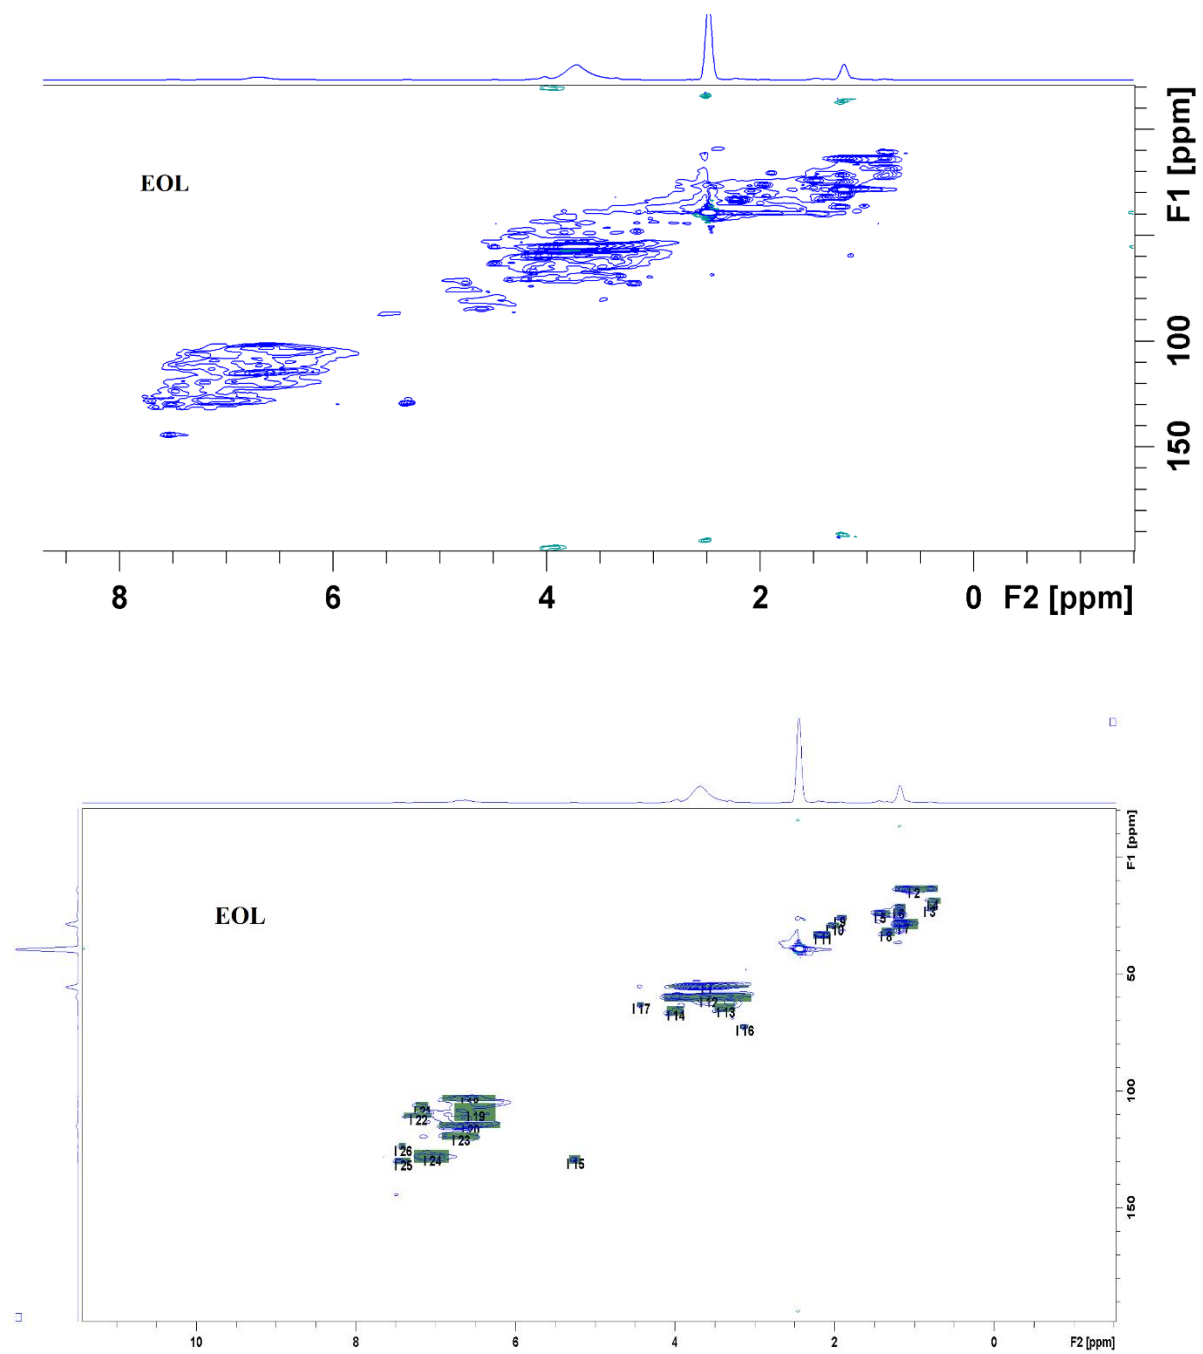

Figure S2d. Full spectra and volume integrations for TC EOL.

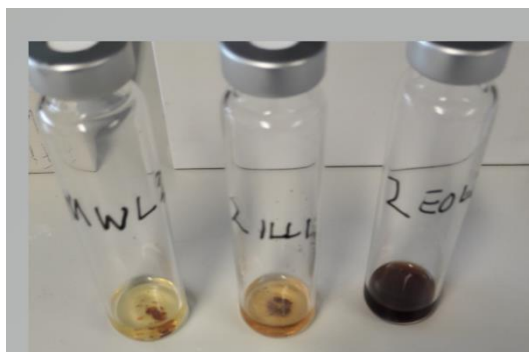

Plate S1. Samples after incubation and GC measurement for Zemplén Transesterification analysis with EOL depicting higher solubility compared to MWL and ILL.
